# Supplementary material
Source: PubMed Central journal article supplement (PMC3156149)
Supplement: 1101459108_pnas.1101459108_SI.pdf [file 1101459108_pnas.1101459108_SI.pdf]

# Supporting Information

Takayama et al. 10.1073/pnas.1101459108

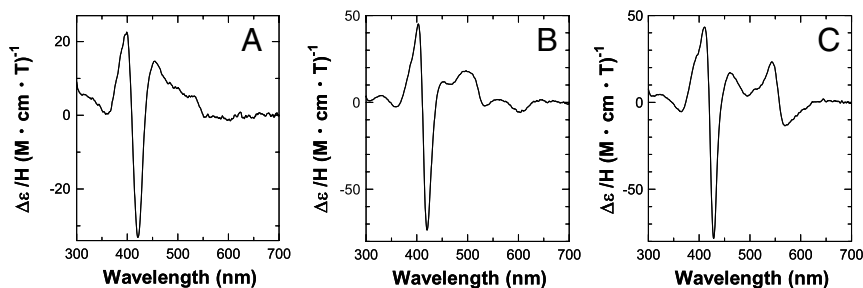

**Fig. S1.** Magnetic circular dichroism (MCD) spectra of IsdI $\text{Fe}^{3+}$  (10  $\mu\text{M}$ , 20  $^{\circ}\text{C}$ ). (A) low-pH form (pH 5.8) (B) high-pH form (pH 8.0), and (C)  $\text{CN}^-$  bound form (pH 8.0). Spectra were recorded with a Jasco Model J-720 spectropolarimeter equipped with an electromagnet (Alpha Magnetics) that generated a magnetic field of 1 T. MCD spectra were calculated from the difference between spectra obtained with parallel and antiparallel field orientations. The MCD spectra of low-pH, high-pH, and  $\text{CN}^-$  bound forms of IsdI are displayed in Fig. S1, and MCD parameters of the Soret band are compared with those of rat HO-1 in Table S1. The slight red-shift and increase in intensity of the Soret band was observed for all three forms of IsdI relative to HO-1, however, overall spectra pattern is similar in each, indicating that the axial ligand of IsdI is identical to HO-1, which is water at low-pH and hydroxide at high-pH.









**Table S1. Electronic absorption and MCD parameters for IsdI and HOs**

| Absorption spectra         |                                               |                    |                     |                    |
|----------------------------|-----------------------------------------------|--------------------|---------------------|--------------------|
| Protein                    | $\lambda$ max (nm)                            |                    | $\rho K_{\text{a}}$ | $\lambda$ max (nm) |
|                            | (Low pH)                                      | (High pH)          |                     |                    |
| IsdI                       | 404, 640                                      | 412, 485, 520, 578 | 7.1                 | 421, 558           |
| Rat HO-1                   | 404, 500, 631 (1)                             | 413, 540, 575 (1)  | 7.6 (1)             | 418, 536 (2)       |
| Human HO-2                 | 404, 500, 631 (3)                             | 413, 540, 575 (3)  | 8.5 (3)             | —                  |
| pa-HO                      | 405, 503, 537, 638 (4)                        | 415, 540, 574 (5)  | 8.1 (5)             | 419, ~540 (4)      |
| nm-HO                      | 405, 504, 638 (4)                             |                    | 9.3 (4)             | 419, ~540 (4)      |
| MCD spectra                |                                               |                    |                     |                    |
| Protein                    | $\Lambda^*$ ( $\Delta\epsilon$ ) <sup>†</sup> |                    |                     |                    |
|                            | peak                                          | cross-over         | trough              |                    |
| Low-pH form                |                                               |                    |                     |                    |
| IsdI <sup>‡</sup>          | 399 (+23)                                     | 409 (0)            | 421 (-33)           |                    |
| Rat HO-1 <sup>§</sup>      | 399 (+20)                                     | 407 (0)            | 416 (-11)           |                    |
| High-pH form               |                                               |                    |                     |                    |
| IsdI <sup>‡</sup>          | 403 (+45)                                     | 411 (0)            | 420 (-73)           |                    |
| Rat HO-1 <sup>§</sup>      | 402 (+35)                                     | 412 (0)            | 419 (-41)           |                    |
| CN <sup>-</sup> bound form |                                               |                    |                     |                    |
| IsdI                       | 411 (+43)                                     | 420 (0)            | 429 (-78)           |                    |
| Rat HO-1 <sup>§</sup>      | 406 (+52)                                     | 415 (0)            | 423 (-65)           |                    |

\*M<sup>-1</sup> cm<sup>-1</sup> T<sup>-1</sup>.

†M<sup>-1</sup> cm<sup>-1</sup> T<sup>-1</sup>.

‡This work, measured at 20 °C.

§Ref. 6, measured at 4 °C.

- 1 Takahashi S, et al. (1994) Heme-heme oxygenase complex. Structure of the catalytic site and its implication for oxygen activation. *J Biol Chem* 269:1010–1014.
- 2 Hawkins BK, Wilks A, Powers LS, Ortiz de Montellano PR, Dawson JH (1996) Ligation of the iron in the heme-heme oxygenase complex: X-ray absorption, electronic absorption, and magnetic circular dichroism studies. *Biochim Biophys Acta* 1295:165–173.
- 3 Ishikawa K, et al. (1995) Heme oxygenase-2. *J Biol Chem* 270:6345–6350.
- 4 Zeng Y, et al. (2005) Azide-inhibited bacterial heme oxygenases exhibit an  $S = 3/2(d_{xz}, d_{yz})^3(d_{xy})^1(d_{z^2})^1$  spin state: Mechanistic implications for heme oxidation. *J Am Chem Soc* 127:9794–9807.
- 5 Caignan GA, et al. (2003) The hydroxide complex of *Pseudomonas aeruginosa* heme oxygenase as a model of the low-spin iron(III) hydroperoxide intermediate in heme catabolism: <sup>13</sup>C NMR spectroscopic studies suggest the active participation of the heme in macrocycle hydroxylation. *J Am Chem Soc* 125:11842–11852.
- 6 Hawkins BK, Wilks A, Powers LS, Ortiz de Montellano PR, Dawson JH (1996) Ligation of the iron in the heme-heme oxygenase complex: X-ray absorption, electronic absorption and magnetic circular dichroism studies. *Biochim Biophys Acta* 1295:165–173, measured at 4 °C.

**Table S2. Heme protein methyl and meso-H chemical shifts**

| Protein              | Temp. (°C) | Methyl shifts (ppm)      | Av. (ppm) | Meso-H shifts (ppm)      | Av. (ppm) | Reference |
|----------------------|------------|--------------------------|-----------|--------------------------|-----------|-----------|
| Hydroxide bound form |            |                          |           |                          |           |           |
| Isdl                 | 30         | 13.8, 10.9, 8.1, 4.5     | 9.3       |                          |           | This work |
| pa-HO                | 25         | 24, 17, 14, (10) *       | (12.3) *  |                          |           | 1         |
| nm-HO                | 25         | 19.5, 17.5, 8.0, (7.0) * | (16.3) *  |                          |           | 2         |
| Nitrophorin2         | 30         | 19.0, 13.0, 10.7, 6.5    | 12.3      |                          |           | 3         |
| SW Mb                | 25         | 38.1, 38.1, 33.6, 26.8   | 34.1      |                          |           | 4         |
| Cyanide bound form   |            |                          |           |                          |           |           |
| Isdl                 | 30         | 12.0, 10.6, 8.0, 4.0     | 8.7       | -1.7, -9.5, -10.7, -16.8 | -9.7      | This work |
| human HO-1 †         | 25         | 19.6, 10.5, 9.0, 5.0     | 11.0      | 7.6, 7.1, 3.8, -5.1      | 3.4       | 5         |
| pa-HO                | 10         | 27.7, 22.7, 19.0, 4.4    | 18.5      | 9.0, 8.6, -2.2, -2.5     | 3.2       | 6         |
| nm-HO                | 25         | 21.4, 10.3, 9.6, 7.9     | 12.3      |                          |           | 2         |
| cd-HO                | 35         | 19.2, 10.6, 8.5, 5.4     | 10.9      | 8.2, 7.8, 2.4, -2.6      | 4.0       | 6         |
| HmuO                 | 25         | 19.7, 10.4, 8.1, 4.9     | 10.8      | 7.2, -3.6                |           | 7         |
| Nitrophorin2         | 35         | 18.1, 13.4, 9.1, 7.6     | 12.1      | 5.6, 2.3, 2.3, -1.6      | 2.2       | 8         |
| SW Mb                | 25         | 27.0, 18.6, 12.9, 4.8    | 15.8      | 6.0, 4.4, 4.1, 2.1       | 4.2       | 9         |

\*Ref. 3.

†Protein reconstituted with protohemin.

- 1 Caignan GA, et al. (2003) The hydroxide complex of *Pseudomonas aeruginosa* heme oxygenase as a model of the low-spin iron(III) hydroperoxide intermediate in heme catabolism:  $^{13}\text{C}$  NMR spectroscopic studies suggest the active participation of the heme in macrocycle hydroxylation. *J Am Chem Soc* 125:11842–11852.
- 2 Ma L-H, Liu Y, Zhang X, Yoshida T, La Mar GN (2006)  $^1\text{H}$  NMR study of the magnetic properties and electronic structure of the hydroxide complex of substrate-bound heme oxygenase from *Neisseria meningitidis*: Influence of the axial water deprotonation on the distal H-bond network. *J Am Chem Soc* 128:6657–6668.
- 3 Shokhireva TK, Berry RE, Zhang H, Shokhirev NV, Walker FA (2008) Assignment of ferriheme resonances for high- and low-spin forms of nitrophorin 3 by  $^1\text{H}$  and  $^{13}\text{C}$  NMR spectroscopy and comparison to nitrophorin 2: Heme pocket structural similarities and differences. *Inorg Chim Acta* 361:925–940.
- 4 Koshikawa K, Yamamoto Y, Kamimura S, Matsuoka A, Shikama K (1998) NMR study of dynamics and thermodynamics of acid-alkaline transition in ferric hemoglobin of a midge larva (*Tokunagayusurika akamusi*). *Biochim Biophys Acta* 1385:89–100.
- 5 Gorst CM, Wilks A, Yeh DC, Ortiz de Montellano PR, La Mar GN (1998) Solution  $^1\text{H}$  NMR investigation of the molecular and electronic structure of the active site of substrate-bound human heme oxygenase: The nature of the distal hydrogen bond donor to bound ligands. *J Am Chem Soc* 120:8875–8884.
- 6 Caignan GA, et al. (2002) Oxidation of heme to b- and d-biliverdin by *Pseudomonas aeruginosa* heme oxygenase as a consequence of an unusual seating of the heme. *J Am Chem Soc* 124:14879–14892.
- 7 Li Y, Syvitski RT, Chu GC, Ikeda-Saito M, Mar GNL (2003) Solution  $^1\text{H}$  NMR investigation of the active site molecular and electronic structures of substrate-bound, cyanide-inhibited HmuO, a bacterial heme oxygenase from *Corynebacterium diphtheriae*. *J Biol Chem* 278:6651–6663.
- 8 Yang F, et al. (2009)  $^1\text{H}$  and  $^{13}\text{C}$  NMR spectroscopic studies of the ferriheme resonances of three low-spin complexes of wild-type nitrophorin 2 and nitrophorin 2(V24E) as a function of pH. *J Biol Inorg Chem* 14:1077–1095.
- 9 Emerson SD, La Mar GN (1990) Solution structural characterization of cyanometmyoglobin: Resonance assignment of heme cavity residues by two-dimensional NMR. *Biochemistry* 29:1545–1556.

**Table S3. The  $^1\text{H}$  chemical shifts of the heme substituents of IsdlFe $^{3+}$ -CN $^-$  at 25 °C**

| Position         | Shifts (ppm) | Position              | Shifts (ppm) |
|------------------|--------------|-----------------------|--------------|
| 1 methyl         | 3.9          | meso- $\alpha$        | -11.2        |
| 3 methyl         | 12.0         | meso- $\beta$         | -10.0        |
| 5 methyl         | 7.9          | meso- $\gamma$        | -2.1         |
| 8 methyl         | 10.6         | meso- $\delta$        | -17.6        |
| 2 vinyl $\alpha$ | 9.7          | 6 propionate $\alpha$ | 7.8, 7.5     |
| 2 vinyl $\beta$  | 4.4, 4.2     | 6 propionate $\beta$  | 3.3, 2.9     |
| 4 vinyl $\alpha$ | 13.2         | 7 propionate $\alpha$ | 11.0, 9.1    |
| 4 vinyl $\beta$  | 6.3, 5.3     | 7 propionate $\beta$  | 5.8, 5.4     |

**Table S4. X-ray crystallography data collection and refinement statistics for IsdI<sup>Fe<sup>3+</sup></sup>CN**

|                                     |                                |
|-------------------------------------|--------------------------------|
| Data collection*                    |                                |
| Resolution range (Å)                | 47.75–1.80                     |
| Space group                         | $P2_12_12_1$                   |
| Unit cell dimension (Å)             | $a = 58.8, b = 65.9, c = 69.3$ |
| Unique reflections                  | 25604 (3686)                   |
| Completeness (%)                    | 99.5 (99.7)                    |
| Average $I/\sigma$                  | 16.8 (5.1)                     |
| Redundancy                          | 6.7 (6.9)                      |
| $R_{\text{merge}}$                  | 0.078 (0.370)                  |
| Refinement                          |                                |
| $R_{\text{work}} (R_{\text{free}})$ | 0.175 (0.196)                  |
| No. Atoms:                          |                                |
| Protein                             | 1902                           |
| Solvent                             | 254                            |
| Heme                                | 86                             |
| Cyanide                             | 4                              |
| Overall B-factor (Å <sup>2</sup> )  | 17.1                           |
| Protein                             | 15.9                           |
| Solvent                             | 27.4                           |
| Heme                                | 12.9                           |
| Cyanide                             | 11.8                           |
| R.m.s.deviation                     |                                |
| Bond length (Å)                     | 0.013                          |
| Bond angles (°)                     | 1.255                          |

\*Values in parentheses are for the highest resolution shell.
